# Supplementary material for: Molecular properties underlying regional vulnerability to Alzheimer’s disease pathology
Source: PubMed Central journal article supplement — Brain. 2018 Jul 16;141(9):2755–71. doi: 10.1093/brain/awy189 (PMC6113636; doi:10.1093/brain/awy189), 2018-07-16
Supplement: awy189_table_s1.pdf [file awy189_table_s1.pdf]

**Table S1. Leading edge genes of gene sets associated with amyloid vulnerability**

| GENE   | SPATIAL           |             | CLUSTER | N GENE SETS |
|--------|-------------------|-------------|---------|-------------|
|        | RANK IN GENE LIST | CORRELATION |         |             |
| RPS27A | 19616             | -0.35       | A1      | 13          |
| RPS28  | 20710             | -0.59       | A1      | 12          |
| RPS25  | 20530             | -0.48       | A1      | 12          |
| RPS15A | 20195             | -0.41       | A1      | 12          |
| RPS12  | 20072             | -0.40       | A1      | 12          |
| RPS23  | 19964             | -0.38       | A1      | 12          |
| RPS14  | 19286             | -0.33       | A1      | 12          |
| RPS27  | 19197             | -0.32       | A1      | 12          |
| RPS29  | 18752             | -0.30       | A1      | 12          |
| RPS9   | 18476             | -0.28       | A1      | 12          |
| RPS8   | 18394             | -0.28       | A1      | 12          |
| RPS7   | 17769             | -0.25       | A1      | 12          |
| RPS6   | 17108             | -0.22       | A1      | 12          |
| RPS17  | 16808             | -0.21       | A1      | 12          |
| RPS4Y1 | 16414             | -0.19       | A1      | 12          |
| RPS10  | 16161             | -0.19       | A1      | 12          |
| RPSA   | 16811             | -0.21       | A1      | 11          |
| RPS5   | 15751             | -0.17       | A1      | 11          |
| RPS21  | 15593             | -0.17       | A1      | 11          |
| RPL23A | 20638             | -0.52       | A1      | 10          |
| RPLP2  | 20561             | -0.49       | A1      | 10          |
| RPL4   | 20427             | -0.45       | A1      | 10          |
| RPL11  | 20064             | -0.40       | A1      | 10          |
| RPL3   | 20031             | -0.39       | A1      | 10          |
| RPL26  | 19699             | -0.36       | A1      | 10          |
| RPLP1  | 19590             | -0.35       | A1      | 10          |
| RPL27A | 19298             | -0.33       | A1      | 10          |
| RPL30  | 19284             | -0.33       | A1      | 10          |
| RPL9   | 19099             | -0.31       | A1      | 10          |

|           |       |          |    |
|-----------|-------|----------|----|
| RPL13A    | 19087 | -0.31 A1 | 10 |
| RPL24     | 18981 | -0.31 A1 | 10 |
| RPL31     | 18883 | -0.30 A1 | 10 |
| RPL7      | 18881 | -0.30 A1 | 10 |
| RPL22     | 18683 | -0.29 A1 | 10 |
| RPL3L     | 18607 | -0.29 A1 | 10 |
| RPL21     | 18589 | -0.29 A1 | 10 |
| RPL37     | 18464 | -0.28 A1 | 10 |
| RPL15     | 18206 | -0.27 A1 | 10 |
| RPL34     | 17897 | -0.25 A1 | 10 |
| RPL5      | 17843 | -0.25 A1 | 10 |
| RPL14     | 17736 | -0.25 A1 | 10 |
| RPL27     | 16206 | -0.19 A1 | 10 |
| RPL26L1   | 20304 | -0.43 A1 | 9  |
| LOC653881 | 19457 | -0.34 A1 | 9  |
| RPL36A    | 18770 | -0.30 A1 | 9  |
| RPL10A    | 18405 | -0.28 A1 | 9  |
| RPL23     | 16422 | -0.20 A1 | 9  |
| RPL32     | 16125 | -0.19 A1 | 9  |
| RPL37A    | 15678 | -0.17 A1 | 8  |
| RPS19     | 15198 | -0.16 A1 | 6  |
| RPS20     | 15184 | -0.16 A1 | 6  |
| EIF4E     | 18775 | -0.30 A1 | 5  |
| EIF4A1    | 17281 | -0.23 A1 | 5  |
| EIF4B     | 16322 | -0.19 A1 | 5  |
| EIF3H     | 20598 | -0.51 A1 | 4  |
| PSMA3     | 20519 | -0.47 A1 | 4  |
| PSMD6     | 20271 | -0.42 A1 | 4  |
| PSMD14    | 19875 | -0.37 A1 | 4  |
| PSMA4     | 19747 | -0.36 A1 | 4  |
| PSMA7     | 19573 | -0.35 A1 | 4  |
| PSMB8     | 19494 | -0.34 A1 | 4  |
| PSMA2     | 19163 | -0.32 A1 | 4  |

|        |       |          |   |
|--------|-------|----------|---|
| EIF3E  | 18938 | -0.31 A1 | 4 |
| PSMC6  | 18751 | -0.30 A1 | 4 |
| PSMD10 | 18674 | -0.29 A1 | 4 |
| ETF1   | 18456 | -0.28 A1 | 4 |
| PSMD1  | 18428 | -0.28 A1 | 4 |
| PSMD5  | 18353 | -0.28 A1 | 4 |
| EIF3I  | 18203 | -0.27 A1 | 4 |
| PSMA5  | 17939 | -0.26 A1 | 4 |
| PSMB9  | 17935 | -0.26 A1 | 4 |
| PSMC5  | 17284 | -0.23 A1 | 4 |
| PSMD4  | 16801 | -0.21 A1 | 4 |
| EIF2S1 | 16762 | -0.21 A1 | 4 |
| PSMD2  | 16724 | -0.21 A1 | 4 |
| PSMD7  | 16509 | -0.20 A1 | 4 |
| EIF3F  | 16474 | -0.20 A1 | 4 |
| SEC61B | 16201 | -0.19 A1 | 4 |
| EIF2S2 | 15834 | -0.18 A1 | 4 |
| EIF3D  | 15541 | -0.17 A1 | 4 |
| UPF3B  | 20570 | -0.49 A1 | 3 |
| SMG6   | 19226 | -0.32 A1 | 3 |
| NCBP2  | 19134 | -0.32 A1 | 3 |
| RNPS1  | 18766 | -0.30 A1 | 3 |
| UPF3A  | 18614 | -0.29 A1 | 3 |
| CALR   | 17948 | -0.26 A1 | 3 |
| SMG1   | 17899 | -0.25 A1 | 3 |
| EIF4H  | 17832 | -0.25 A1 | 3 |
| HSPA1B | 17287 | -0.23 A1 | 3 |
| CASC3  | 16291 | -0.19 A1 | 3 |
| B2M    | 20721 | -0.61 A1 | 2 |
| ANP32A | 20644 | -0.52 A1 | 2 |
| HLA-A  | 20637 | -0.52 A1 | 2 |
| HLA-K  | 20623 | -0.52 A1 | 2 |
| HLA-F  | 20615 | -0.51 A1 | 2 |

|          |       |          |   |
|----------|-------|----------|---|
| SRP72    | 20575 | -0.50 A1 | 2 |
| HLA-C    | 20544 | -0.48 A1 | 2 |
| ZFP36    | 20448 | -0.46 A1 | 2 |
| HLA-B    | 20359 | -0.44 A1 | 2 |
| TNPO1    | 20131 | -0.40 A1 | 2 |
| EEF1A1   | 20074 | -0.40 A1 | 2 |
| NUP205   | 19946 | -0.38 A1 | 2 |
| SRP9     | 19497 | -0.34 A1 | 2 |
| SEC11C   | 19315 | -0.33 A1 | 2 |
| NUPL2    | 19273 | -0.33 A1 | 2 |
| TAP2     | 19252 | -0.33 A1 | 2 |
| TNFSF13  | 19235 | -0.32 A1 | 2 |
| NUPL1    | 19206 | -0.32 A1 | 2 |
| LSM6     | 18948 | -0.31 A1 | 2 |
| CNOT7    | 18912 | -0.30 A1 | 2 |
| POLR2F   | 18583 | -0.29 A1 | 2 |
| HNRNPD   | 18554 | -0.29 A1 | 2 |
| NUP37    | 18527 | -0.28 A1 | 2 |
| TRAM1    | 18355 | -0.28 A1 | 2 |
| PRKCA    | 17905 | -0.25 A1 | 2 |
| CNOT4    | 17850 | -0.25 A1 | 2 |
| ELAVL1   | 17386 | -0.23 A1 | 2 |
| EEF2     | 17350 | -0.23 A1 | 2 |
| DNAJC3   | 17224 | -0.23 A1 | 2 |
| GTF2F1   | 17144 | -0.22 A1 | 2 |
| SRPRB    | 16633 | -0.20 A1 | 2 |
| SRP14    | 16558 | -0.20 A1 | 2 |
| MAPKAPK2 | 16445 | -0.20 A1 | 2 |
| TPR      | 16268 | -0.19 A1 | 2 |
| PDIA3    | 16194 | -0.19 A1 | 2 |
| NUP107   | 16072 | -0.18 A1 | 2 |
| LSM4     | 16031 | -0.18 A1 | 2 |
| LSM1     | 15735 | -0.17 A1 | 2 |

|           |       |          |   |
|-----------|-------|----------|---|
| AKT1      | 15615 | -0.17 A1 | 2 |
| RPN2      | 15167 | -0.16 A1 | 2 |
| SEC61G    | 15149 | -0.16 A1 | 2 |
| RAN       | 20488 | -0.47 A1 | 1 |
| SNRPG     | 20010 | -0.39 A1 | 1 |
| LOC647030 | 19722 | -0.36 A1 | 1 |
| EEF1B2    | 18930 | -0.30 A1 | 1 |
| EIF5B     | 18925 | -0.30 A1 | 1 |
| SNRPF     | 18890 | -0.30 A1 | 1 |
| GEMIN5    | 18616 | -0.29 A1 | 1 |
| ITGB5     | 17987 | -0.26 A1 | 1 |
| ITGAV     | 17789 | -0.25 A1 | 1 |
| FCGR1B    | 17667 | -0.24 A1 | 1 |
| GEMIN7    | 17590 | -0.24 A1 | 1 |
| TGS1      | 17146 | -0.22 A1 | 1 |
| EEF1G     | 17082 | -0.22 A1 | 1 |
| FCGR1A    | 16787 | -0.21 A1 | 1 |
| MRPL52    | 16440 | -0.20 A1 | 1 |
| NCF2      | 16304 | -0.19 A1 | 1 |
| SNRPD2P1  | 15873 | -0.18 A1 | 1 |
| PRMT5     | 15774 | -0.17 A1 | 1 |
| MRPS24    | 15587 | -0.17 A1 | 1 |
| WDR77     | 15525 | -0.17 A1 | 1 |
| NCBP1     | 15419 | -0.16 A1 | 1 |
| RPL29     | 14839 | -0.15 A1 | 1 |
| RPL18     | 14713 | -0.14 A1 | 1 |
| MRPL51    | 14645 | -0.14 A1 | 1 |
| NDUFA7    | 20614 | -0.51 A2 | 3 |
| NDUFA4    | 20528 | -0.48 A2 | 3 |
| NDUFB6    | 20042 | -0.39 A2 | 3 |
| SDHD      | 19965 | -0.38 A2 | 3 |
| UQCRC     | 19919 | -0.38 A2 | 3 |
| COX6C     | 19767 | -0.36 A2 | 3 |

|         |       |          |   |
|---------|-------|----------|---|
| NDUFB9  | 19627 | -0.35 A2 | 3 |
| CYCS    | 19401 | -0.34 A2 | 3 |
| NDUFA12 | 19208 | -0.32 A2 | 3 |
| NDUFA1  | 18817 | -0.30 A2 | 3 |
| SDHC    | 18729 | -0.29 A2 | 3 |
| NDUFC1  | 18728 | -0.29 A2 | 3 |
| UQCR11  | 18715 | -0.29 A2 | 3 |
| NDUFB4  | 18602 | -0.29 A2 | 3 |
| COX6A1  | 18016 | -0.26 A2 | 3 |
| NDUFB3  | 17759 | -0.25 A2 | 3 |
| UQCRBP1 | 17722 | -0.25 A2 | 3 |
| COX7C   | 17592 | -0.24 A2 | 3 |
| UQCRB   | 17244 | -0.23 A2 | 3 |
| UQCRFS1 | 17226 | -0.23 A2 | 3 |
| COX7A2L | 17161 | -0.22 A2 | 3 |
| NDUFA8  | 17145 | -0.22 A2 | 3 |
| NDUFA2  | 16956 | -0.21 A2 | 3 |
| NDUFA3  | 16797 | -0.21 A2 | 3 |
| COX7B   | 16126 | -0.19 A2 | 3 |
| COX5A   | 15926 | -0.18 A2 | 3 |
| NDUFA6  | 15829 | -0.18 A2 | 3 |
| DLAT    | 15756 | -0.17 A2 | 3 |
| COX5B   | 15726 | -0.17 A2 | 3 |
| COX4I1  | 15488 | -0.17 A2 | 3 |
| ATP5C1  | 20667 | -0.54 A2 | 2 |
| ATP5H   | 20366 | -0.44 A2 | 2 |
| ATP5F1  | 19867 | -0.37 A2 | 2 |
| ATP5L   | 19201 | -0.32 A2 | 2 |
| ATP5E   | 18330 | -0.27 A2 | 2 |
| ATP5I   | 17316 | -0.23 A2 | 2 |
| ATP5G1  | 16763 | -0.21 A2 | 2 |
| ATP5B   | 16170 | -0.19 A2 | 2 |
| UCP2    | 15954 | -0.18 A2 | 2 |

|         |       |                                    |   |
|---------|-------|------------------------------------|---|
| ATP5O   | 15553 | -0.17 A2                           | 2 |
| ETFA    | 20370 | -0.44 A2                           | 1 |
| IDH1    | 20305 | -0.43 A2                           | 1 |
| LDHB    | 19566 | -0.35 A2                           | 1 |
| SUCLA2  | 19556 | -0.35 A2                           | 1 |
| OGDH    | 18947 | -0.31 A2                           | 1 |
| PDHX    | 18873 | -0.30 A2                           | 1 |
| ADHFE1  | 18426 | -0.28 A2                           | 1 |
| SLC16A8 | 17326 | -0.23 A2                           | 1 |
| SUCLG1  | 16106 | -0.19 A2                           | 1 |
| MDH2    | 16073 | -0.18 A2                           | 1 |
| TPM1    | 20724 | -0.61 "SMOOTH MUSCLE CONTRACTION"  | 1 |
| LMOD1   | 20628 | -0.52 "SMOOTH MUSCLE CONTRACTION"  | 1 |
| TPM2    | 20019 | -0.39 "SMOOTH MUSCLE CONTRACTION"  | 1 |
| ITGA1   | 19114 | -0.31 "SMOOTH MUSCLE CONTRACTION"  | 1 |
| SORBS1  | 18524 | -0.28 "SMOOTH MUSCLE CONTRACTION"  | 1 |
| MYL12B  | 18278 | -0.27 "SMOOTH MUSCLE CONTRACTION"  | 1 |
| ITGB5   | 17987 | -0.26 "SMOOTH MUSCLE CONTRACTION"  | 1 |
| SORBS3  | 17725 | -0.25 "SMOOTH MUSCLE CONTRACTION"  | 1 |
| MYLK    | 17550 | -0.24 "SMOOTH MUSCLE CONTRACTION"  | 1 |
| MYL6    | 17002 | -0.22 "SMOOTH MUSCLE CONTRACTION"  | 1 |
| TPM3    | 16844 | -0.21 "SMOOTH MUSCLE CONTRACTION"  | 1 |
| ACTA2   | 16398 | -0.19 "SMOOTH MUSCLE CONTRACTION"  | 1 |
| CALM1   | 16366 | -0.19 "SMOOTH MUSCLE CONTRACTION"  | 1 |
| MYL9    | 15107 | -0.16 "SMOOTH MUSCLE CONTRACTION"  | 1 |
| MYH11   | 14838 | -0.15 "SMOOTH MUSCLE CONTRACTION"  | 1 |
| OR5K1   | 7     | 0.61 "OLFACTORY SIGNALING PATHWAY" | 1 |
| OR10X1  | 66    | 0.51 "OLFACTORY SIGNALING PATHWAY" | 1 |
| GNB1    | 92    | 0.49 "OLFACTORY SIGNALING PATHWAY" | 1 |
| OR1L8   | 110   | 0.48 "OLFACTORY SIGNALING PATHWAY" | 1 |
| OR5D13  | 197   | 0.44 "OLFACTORY SIGNALING PATHWAY" | 1 |
| OR5P2   | 202   | 0.44 "OLFACTORY SIGNALING PATHWAY" | 1 |
| OR2G3   | 241   | 0.43 "OLFACTORY SIGNALING PATHWAY" | 1 |

|        |      |                                    |   |
|--------|------|------------------------------------|---|
| OR5AR1 | 251  | 0.43 "OLFACTORY SIGNALING PATHWAY" | 1 |
| OR52M1 | 266  | 0.42 "OLFACTORY SIGNALING PATHWAY" | 1 |
| OR1L1  | 269  | 0.42 "OLFACTORY SIGNALING PATHWAY" | 1 |
| OR51E1 | 297  | 0.41 "OLFACTORY SIGNALING PATHWAY" | 1 |
| OR10G7 | 464  | 0.38 "OLFACTORY SIGNALING PATHWAY" | 1 |
| OR1Q1  | 541  | 0.37 "OLFACTORY SIGNALING PATHWAY" | 1 |
| OR6B2  | 585  | 0.36 "OLFACTORY SIGNALING PATHWAY" | 1 |
| OR52B4 | 600  | 0.36 "OLFACTORY SIGNALING PATHWAY" | 1 |
| OR2D3  | 635  | 0.35 "OLFACTORY SIGNALING PATHWAY" | 1 |
| OR5AN1 | 678  | 0.35 "OLFACTORY SIGNALING PATHWAY" | 1 |
| OR51I2 | 706  | 0.34 "OLFACTORY SIGNALING PATHWAY" | 1 |
| OR4L1  | 769  | 0.34 "OLFACTORY SIGNALING PATHWAY" | 1 |
| OR2T27 | 789  | 0.33 "OLFACTORY SIGNALING PATHWAY" | 1 |
| OR5M3  | 929  | 0.32 "OLFACTORY SIGNALING PATHWAY" | 1 |
| OR2A5  | 943  | 0.32 "OLFACTORY SIGNALING PATHWAY" | 1 |
| OR1D4  | 952  | 0.32 "OLFACTORY SIGNALING PATHWAY" | 1 |
| OR5B12 | 954  | 0.32 "OLFACTORY SIGNALING PATHWAY" | 1 |
| OR4M2  | 1008 | 0.31 "OLFACTORY SIGNALING PATHWAY" | 1 |
| OR51L1 | 1011 | 0.31 "OLFACTORY SIGNALING PATHWAY" | 1 |
| OR5R1  | 1044 | 0.31 "OLFACTORY SIGNALING PATHWAY" | 1 |
| OR4S1  | 1127 | 0.30 "OLFACTORY SIGNALING PATHWAY" | 1 |
| OR6N2  | 1129 | 0.30 "OLFACTORY SIGNALING PATHWAY" | 1 |
| OR2K2  | 1152 | 0.30 "OLFACTORY SIGNALING PATHWAY" | 1 |
| OR4C16 | 1165 | 0.30 "OLFACTORY SIGNALING PATHWAY" | 1 |
| OR10Q1 | 1176 | 0.30 "OLFACTORY SIGNALING PATHWAY" | 1 |
| OR4K1  | 1193 | 0.30 "OLFACTORY SIGNALING PATHWAY" | 1 |
| OR10A3 | 1228 | 0.30 "OLFACTORY SIGNALING PATHWAY" | 1 |
| OR4A16 | 1233 | 0.30 "OLFACTORY SIGNALING PATHWAY" | 1 |
| OR6K6  | 1322 | 0.29 "OLFACTORY SIGNALING PATHWAY" | 1 |
| OR51D1 | 1333 | 0.29 "OLFACTORY SIGNALING PATHWAY" | 1 |
| OR1M1  | 1382 | 0.28 "OLFACTORY SIGNALING PATHWAY" | 1 |
| OR10A4 | 1383 | 0.28 "OLFACTORY SIGNALING PATHWAY" | 1 |
| OR10G4 | 1389 | 0.28 "OLFACTORY SIGNALING PATHWAY" | 1 |



|        |      |                                    |   |
|--------|------|------------------------------------|---|
| OR4D9  | 1397 | 0.28 "OLFACTORY SIGNALING PATHWAY" | 1 |
| OR52N4 | 1399 | 0.28 "OLFACTORY SIGNALING PATHWAY" | 1 |
| OR4F5  | 1419 | 0.28 "OLFACTORY SIGNALING PATHWAY" | 1 |
| OR52D1 | 1459 | 0.28 "OLFACTORY SIGNALING PATHWAY" | 1 |
| OR4X1  | 1469 | 0.28 "OLFACTORY SIGNALING PATHWAY" | 1 |
| OR56B1 | 1500 | 0.28 "OLFACTORY SIGNALING PATHWAY" | 1 |
| OR51V1 | 1540 | 0.27 "OLFACTORY SIGNALING PATHWAY" | 1 |
| OR2J3  | 1554 | 0.27 "OLFACTORY SIGNALING PATHWAY" | 1 |
| OR5L1  | 1563 | 0.27 "OLFACTORY SIGNALING PATHWAY" | 1 |
| OR5J2  | 1606 | 0.27 "OLFACTORY SIGNALING PATHWAY" | 1 |
| OR52E4 | 1623 | 0.27 "OLFACTORY SIGNALING PATHWAY" | 1 |
| OR52K1 | 1642 | 0.27 "OLFACTORY SIGNALING PATHWAY" | 1 |
| OR4S2  | 1645 | 0.27 "OLFACTORY SIGNALING PATHWAY" | 1 |
| OR2T2  | 1701 | 0.26 "OLFACTORY SIGNALING PATHWAY" | 1 |
| OR5K2  | 1744 | 0.26 "OLFACTORY SIGNALING PATHWAY" | 1 |
| OR51B6 | 1757 | 0.26 "OLFACTORY SIGNALING PATHWAY" | 1 |
| OR2T11 | 1806 | 0.26 "OLFACTORY SIGNALING PATHWAY" | 1 |
| OR1I1  | 1850 | 0.25 "OLFACTORY SIGNALING PATHWAY" | 1 |
| OR2A25 | 1854 | 0.25 "OLFACTORY SIGNALING PATHWAY" | 1 |
| OR6C1  | 1881 | 0.25 "OLFACTORY SIGNALING PATHWAY" | 1 |
| OR2T5  | 1904 | 0.25 "OLFACTORY SIGNALING PATHWAY" | 1 |
| OR56B4 | 1970 | 0.25 "OLFACTORY SIGNALING PATHWAY" | 1 |
| OR2C3  | 2013 | 0.24 "OLFACTORY SIGNALING PATHWAY" | 1 |
| OR7G3  | 2043 | 0.24 "OLFACTORY SIGNALING PATHWAY" | 1 |
| OR51A2 | 2046 | 0.24 "OLFACTORY SIGNALING PATHWAY" | 1 |
| OR6X1  | 2063 | 0.24 "OLFACTORY SIGNALING PATHWAY" | 1 |
| OR8J3  | 2068 | 0.24 "OLFACTORY SIGNALING PATHWAY" | 1 |
| OR9Q1  | 2077 | 0.24 "OLFACTORY SIGNALING PATHWAY" | 1 |
| OR10S1 | 2177 | 0.23 "OLFACTORY SIGNALING PATHWAY" | 1 |
| OR56A4 | 2186 | 0.23 "OLFACTORY SIGNALING PATHWAY" | 1 |
| GNGT1  | 2190 | 0.23 "OLFACTORY SIGNALING PATHWAY" | 1 |
| OR2S2  | 2228 | 0.23 "OLFACTORY SIGNALING PATHWAY" | 1 |
| OR5D18 | 2257 | 0.23 "OLFACTORY SIGNALING PATHWAY" | 1 |

|         |      |                                    |   |
|---------|------|------------------------------------|---|
| OR51B2  | 2321 | 0.23 "OLFACTORY SIGNALING PATHWAY" | 1 |
| OR1N1   | 2335 | 0.23 "OLFACTORY SIGNALING PATHWAY" | 1 |
| OR4F15  | 2345 | 0.23 "OLFACTORY SIGNALING PATHWAY" | 1 |
| OR10AG1 | 2350 | 0.23 "OLFACTORY SIGNALING PATHWAY" | 1 |
| OR2AE1  | 2422 | 0.22 "OLFACTORY SIGNALING PATHWAY" | 1 |
| OR5B2   | 2525 | 0.22 "OLFACTORY SIGNALING PATHWAY" | 1 |
| OR8K1   | 2551 | 0.21 "OLFACTORY SIGNALING PATHWAY" | 1 |
| OR52E2  | 2588 | 0.21 "OLFACTORY SIGNALING PATHWAY" | 1 |
| OR4C12  | 2656 | 0.21 "OLFACTORY SIGNALING PATHWAY" | 1 |
| OR4K14  | 2657 | 0.21 "OLFACTORY SIGNALING PATHWAY" | 1 |
| OR1L3   | 2660 | 0.21 "OLFACTORY SIGNALING PATHWAY" | 1 |
| OR7C1   | 2667 | 0.21 "OLFACTORY SIGNALING PATHWAY" | 1 |
| OR9I1   | 2731 | 0.21 "OLFACTORY SIGNALING PATHWAY" | 1 |
| OR7D4   | 2795 | 0.20 "OLFACTORY SIGNALING PATHWAY" | 1 |
| OR51I1  | 2802 | 0.20 "OLFACTORY SIGNALING PATHWAY" | 1 |
| OR2T4   | 2893 | 0.20 "OLFACTORY SIGNALING PATHWAY" | 1 |
| OR4X2   | 2898 | 0.20 "OLFACTORY SIGNALING PATHWAY" | 1 |
| OR2V2   | 2966 | 0.20 "OLFACTORY SIGNALING PATHWAY" | 1 |
| OR9Q2   | 2994 | 0.19 "OLFACTORY SIGNALING PATHWAY" | 1 |
| OR52J3  | 3016 | 0.19 "OLFACTORY SIGNALING PATHWAY" | 1 |
| OR4E2   | 3032 | 0.19 "OLFACTORY SIGNALING PATHWAY" | 1 |
| OR4B1   | 3040 | 0.19 "OLFACTORY SIGNALING PATHWAY" | 1 |
| OR8I2   | 3046 | 0.19 "OLFACTORY SIGNALING PATHWAY" | 1 |
| OR4D1   | 3066 | 0.19 "OLFACTORY SIGNALING PATHWAY" | 1 |
| OR9K2   | 3145 | 0.19 "OLFACTORY SIGNALING PATHWAY" | 1 |
| OR5AU1  | 3154 | 0.19 "OLFACTORY SIGNALING PATHWAY" | 1 |
| OR6F1   | 3168 | 0.19 "OLFACTORY SIGNALING PATHWAY" | 1 |
| OR14C36 | 3204 | 0.18 "OLFACTORY SIGNALING PATHWAY" | 1 |
| OR5W2   | 3281 | 0.18 "OLFACTORY SIGNALING PATHWAY" | 1 |
| OR1J2   | 3300 | 0.18 "OLFACTORY SIGNALING PATHWAY" | 1 |
| OR52N5  | 3322 | 0.18 "OLFACTORY SIGNALING PATHWAY" | 1 |
| OR1L4   | 3373 | 0.18 "OLFACTORY SIGNALING PATHWAY" | 1 |
| OR5AS1  | 3379 | 0.18 "OLFACTORY SIGNALING PATHWAY" | 1 |

|        |      |                                    |   |
|--------|------|------------------------------------|---|
| OR10A7 | 3388 | 0.18 "OLFACTORY SIGNALING PATHWAY" | 1 |
| OR10G9 | 3456 | 0.17 "OLFACTORY SIGNALING PATHWAY" | 1 |
| OR11G2 | 3498 | 0.17 "OLFACTORY SIGNALING PATHWAY" | 1 |
| OR6K3  | 3630 | 0.17 "OLFACTORY SIGNALING PATHWAY" | 1 |
| OR4C6  | 3631 | 0.17 "OLFACTORY SIGNALING PATHWAY" | 1 |
| OR56A3 | 3667 | 0.17 "OLFACTORY SIGNALING PATHWAY" | 1 |
| OR9G4  | 3711 | 0.16 "OLFACTORY SIGNALING PATHWAY" | 1 |
| OR8B12 | 3725 | 0.16 "OLFACTORY SIGNALING PATHWAY" | 1 |
| OR52I1 | 3773 | 0.16 "OLFACTORY SIGNALING PATHWAY" | 1 |
| OR5B3  | 3794 | 0.16 "OLFACTORY SIGNALING PATHWAY" | 1 |
| OR5AK2 | 3814 | 0.16 "OLFACTORY SIGNALING PATHWAY" | 1 |
| OR4N5  | 3848 | 0.16 "OLFACTORY SIGNALING PATHWAY" | 1 |
| OR10Z1 | 4000 | 0.15 "OLFACTORY SIGNALING PATHWAY" | 1 |
| OR4F3  | 4009 | 0.15 "OLFACTORY SIGNALING PATHWAY" | 1 |
| OR5A2  | 4070 | 0.15 "OLFACTORY SIGNALING PATHWAY" | 1 |
| OR4K13 | 4178 | 0.15 "OLFACTORY SIGNALING PATHWAY" | 1 |
| OR2T34 | 4184 | 0.15 "OLFACTORY SIGNALING PATHWAY" | 1 |
| OR8D2  | 4237 | 0.14 "OLFACTORY SIGNALING PATHWAY" | 1 |
| OR1A1  | 4244 | 0.14 "OLFACTORY SIGNALING PATHWAY" | 1 |
