# Supplementary material for: Molecular properties underlying regional vulnerability to Alzheimer’s disease pathology
Source: PubMed Central journal article supplement — Brain. 2018 Jul 16;141(9):2755–71. doi: 10.1093/brain/awy189 (PMC6113636; doi:10.1093/brain/awy189), 2018-07-16
Supplement: awy189_table_s2.pdf [file awy189_table_s2.pdf]

**Table S2. Leading edge genes of gene sets associated with neurodegeneration vulnerability**

| GENE   | RANK IN GENE LIST | SPATIAL     |         | N GENE SETS |
|--------|-------------------|-------------|---------|-------------|
|        |                   | CORRELATION | CLUSTER |             |
| KLK8   | 39                | 0.69        | N1      | 4           |
| APOE   | 203               | 0.62        | N1      | 4           |
| SLIT1  | 336               | 0.59        | N1      | 4           |
| OPHN1  | 398               | 0.58        | N1      | 4           |
| PAX2   | 438               | 0.57        | N1      | 4           |
| PARD3  | 441               | 0.57        | N1      | 4           |
| ROBO1  | 563               | 0.56        | N1      | 4           |
| SEMA4F | 723               | 0.54        | N1      | 4           |
| ROBO2  | 944               | 0.52        | N1      | 4           |
| NRP2   | 1199              | 0.49        | N1      | 4           |
| CDK5R1 | 1358              | 0.48        | N1      | 4           |
| BAIAP2 | 1401              | 0.48        | N1      | 4           |
| MAPT   | 1620              | 0.46        | N1      | 4           |
| DPYSL5 | 1857              | 0.44        | N1      | 4           |
| KAL1   | 1878              | 0.44        | N1      | 4           |
| GLI2   | 1917              | 0.44        | N1      | 4           |
| NTNG2  | 2004              | 0.43        | N1      | 4           |
| YWHAH  | 506               | 0.57        | N1      | 3           |
| RTN4   | 3245              | 0.35        | N1      | 3           |
| FEZ2   | 3334              | 0.34        | N1      | 3           |
| NRXN1  | 3721              | 0.32        | N1      | 3           |
| LAMB1  | 1683              | 0.45        | N1      | 2           |
| CDK5   | 2155              | 0.42        | N1      | 2           |
| LST1   | 2864              | 0.37        | N1      | 2           |
| GHRL   | 3177              | 0.35        | N1      | 2           |
| TGFB2  | 2908              | 0.37        | N1      | 1           |
| NRL    | 2933              | 0.37        | N1      | 1           |
| YWHAB  | 655               | 0.54        | N2      | 3           |
| MAPK1  | 223               | 0.61        | N2      | 3           |

|            |      |         |   |
|------------|------|---------|---|
| GRB2       | 456  | 0.57 N2 | 3 |
| MAPK3      | 940  | 0.52 N2 | 3 |
| HRAS       | 1420 | 0.47 N2 | 3 |
| MAP2K1     | 1606 | 0.46 N2 | 3 |
| SHC3       | 1706 | 0.45 N2 | 3 |
| NRAS       | 1898 | 0.44 N2 | 3 |
| SHC2       | 1908 | 0.44 N2 | 3 |
| KRAS       | 2377 | 0.41 N2 | 3 |
| MAPK11     | 1338 | 0.48 N2 | 2 |
| RALGDS     | 2409 | 0.40 N2 | 2 |
| RALA       | 2989 | 0.37 N2 | 2 |
| MAPKAPK3   | 4332 | 0.28 N2 | 2 |
| SHC1       | 4343 | 0.28 N2 | 2 |
| KIDINS220  | 3032 | 0.36 N2 | 1 |
| FRS2       | 3035 | 0.36 N2 | 1 |
| CRK        | 3171 | 0.35 N2 | 1 |
| AGRN       | 3821 | 0.31 N3 | 2 |
| GPC5       | 273  | 0.60 N3 | 2 |
| GPC4       | 361  | 0.59 N3 | 2 |
| GPC6       | 713  | 0.54 N3 | 2 |
| DCN        | 994  | 0.51 N3 | 2 |
| B3GALT6    | 1178 | 0.49 N3 | 2 |
| B3GAT1     | 1526 | 0.47 N3 | 2 |
| NCAN       | 1725 | 0.45 N3 | 2 |
| GPC3       | 1797 | 0.44 N3 | 2 |
| SDC4       | 1867 | 0.44 N3 | 2 |
| SDC3       | 2502 | 0.40 N3 | 2 |
| B3GAT2     | 3157 | 0.36 N3 | 2 |
| SDC2       | 3496 | 0.34 N3 | 2 |
| CSPG4      | 4689 | 0.26 N3 | 2 |
| BCAN       | 4867 | 0.26 N3 | 2 |
| GPC2       | 4892 | 0.25 N3 | 2 |
| CSGALNACT1 | 356  | 0.59 N3 | 1 |

|            |      |                                                                                                      |   |
|------------|------|------------------------------------------------------------------------------------------------------|---|
| CHSY3      | 674  | 0.54 N3                                                                                              | 1 |
| CHST7      | 1407 | 0.48 N3                                                                                              | 1 |
| IDS        | 1852 | 0.44 N3                                                                                              | 1 |
| HEXA       | 2198 | 0.42 N3                                                                                              | 1 |
| CHST9      | 3480 | 0.34 N3                                                                                              | 1 |
| CSGALNACT2 | 4413 | 0.28 N3                                                                                              | 1 |
| RAPGEF4    | 35   | 0.70 "RAP1 SIGNALLING"                                                                               | 1 |
| YWHAZ      | 183  | 0.63 "RAP1 SIGNALLING"                                                                               | 1 |
| RAPGEF3    | 294  | 0.60 "RAP1 SIGNALLING"                                                                               | 1 |
| PRKG1      | 959  | 0.51 "RAP1 SIGNALLING"                                                                               | 1 |
| RAP1B      | 2055 | 0.43 "RAP1 SIGNALLING"                                                                               | 1 |
| RAP1GAP    | 2546 | 0.39 "RAP1 SIGNALLING"                                                                               | 1 |
| SIPA1      | 3127 | 0.36 "RAP1 SIGNALLING"                                                                               | 1 |
| ALDH4A1    | 320  | 0.59 "OXIDOREDUCTASE ACTIVITY ACTING ON THE ALDEHYDE OR OXO GROUP OF DONORS NAD OR NADP AS ACCEPTOR" | 1 |
| ALDH2      | 984  | 0.51 "OXIDOREDUCTASE ACTIVITY ACTING ON THE ALDEHYDE OR OXO GROUP OF DONORS NAD OR NADP AS ACCEPTOR" | 1 |
| ALDH6A1    | 1007 | 0.51 "OXIDOREDUCTASE ACTIVITY ACTING ON THE ALDEHYDE OR OXO GROUP OF DONORS NAD OR NADP AS ACCEPTOR" | 1 |
| ALDH9A1    | 1205 | 0.49 "OXIDOREDUCTASE ACTIVITY ACTING ON THE ALDEHYDE OR OXO GROUP OF DONORS NAD OR NADP AS ACCEPTOR" | 1 |
| ADH5       | 1334 | 0.48 "OXIDOREDUCTASE ACTIVITY ACTING ON THE ALDEHYDE OR OXO GROUP OF DONORS NAD OR NADP AS ACCEPTOR" | 1 |
| ALDH3A2    | 1423 | 0.47 "OXIDOREDUCTASE ACTIVITY ACTING ON THE ALDEHYDE OR OXO GROUP OF DONORS NAD OR NADP AS ACCEPTOR" | 1 |
| ALDH1A2    | 1983 | 0.43 "OXIDOREDUCTASE ACTIVITY ACTING ON THE ALDEHYDE OR OXO GROUP OF DONORS NAD OR NADP AS ACCEPTOR" | 1 |
| ALDH7A1    | 2024 | 0.43 "OXIDOREDUCTASE ACTIVITY ACTING ON THE ALDEHYDE OR OXO GROUP OF DONORS NAD OR NADP AS ACCEPTOR" | 1 |
