# Supplementary material for: Molecular properties underlying regional vulnerability to Alzheimer’s disease pathology
Source: PubMed Central journal article supplement — Brain. 2018 Jul 16;141(9):2755–71. doi: 10.1093/brain/awy189 (PMC6113636; doi:10.1093/brain/awy189), 2018-07-16
Supplement: awy189_table_s3.pdf [file awy189_table_s3.pdf]

|        |                                                                                     |   |
|--------|-------------------------------------------------------------------------------------|---|
|        | REACTOME_TAK1_ACTIVATES_NFKB_BY_PHOSPHORYLATION_AND_ACTIVATION_OF_IKKS_COMPLEX      | 0 |
|        | REACTOME_THE_NLRP3_INFLAMMASOME                                                     | 0 |
|        | REACTOME_TOLL_RECEPTOR_CASCADES                                                     | 0 |
|        | REACTOME_TRAF6_MEDIATED_INDUCION_OF_NFKB_AND_MAP_KINASES_UPON_TLR7_8_OR_9_ACTIVATIO |   |
|        | N                                                                                   | 0 |
|        | REACTOME_TRAF6_MEDIATED_NFKB_ACTIVATION                                             | 0 |
|        | REACTOME_TRIF_MEDIATED_TLR3_SIGNALING                                               | 0 |
| c5.all | 23 CATION_HOMEOSTASIS                                                               | 0 |
|        | CELL_SURFACE                                                                        | 0 |
|        | CELLULAR_CATION_HOMEOSTASIS                                                         | 0 |
|        | CELLULAR_HOMEOSTASIS                                                                | 0 |
|        | CHEMICAL_HOMEOSTASIS                                                                | 0 |
|        | ENZYME_INHIBITOR_ACTIVITY                                                           | 0 |
|        | ENZYME_REGULATOR_ACTIVITY                                                           | 0 |
|        | EXTRACELLULAR_REGION                                                                | 0 |
|        | HOMEOSTATIC_PROCESS                                                                 | 0 |
|        | IDENTICAL_PROTEIN_BINDING                                                           | 0 |
|        | INTEGRAL_TO_MEMBRANE                                                                | 0 |
|        | INTEGRAL_TO_PLASMA_MEMBRANE                                                         | 0 |
|        | INTRINSIC_TO_MEMBRANE                                                               | 0 |
|        | INTRINSIC_TO_PLASMA_MEMBRANE                                                        | 0 |
|        | ION_HOMEOSTASIS                                                                     | 0 |
|        | MEMBRANE                                                                            | 0 |
|        | MEMBRANE_PART                                                                       | 0 |
|        | PLASMA_MEMBRANE                                                                     | 0 |
|        | PLASMA_MEMBRANE_PART                                                                | 0 |
|        | PROTEASE_INHIBITOR_ACTIVITY                                                         | 0 |
|        | RECEPTOR_BINDING                                                                    | 0 |
|        | REGULATION_OF_BIOLOGICAL_QUALITY                                                    | 0 |
|        | SERINE_TYPE_ENDOPEPTIDASE_INHIBITOR_ACTIVITY                                        | 0 |
