# Supplementary material for: Molecular properties underlying regional vulnerability to Alzheimer’s disease pathology
Source: PubMed Central journal article supplement — Brain. 2018 Jul 16;141(9):2755–71. doi: 10.1093/brain/awy189 (PMC6113636; doi:10.1093/brain/awy189), 2018-07-16
Supplement: awy189_table_s4.pdf [file awy189_table_s4.pdf]

**Table S4. MAPT-containing Gene Sets**

| Database Version | Collection/...             | Total Gene Sets                                             | identified in GSEA<br>(Neurodegeneration) |
|------------------|----------------------------|-------------------------------------------------------------|-------------------------------------------|
| msigdb_v5.1.xml  | c2.cp.reactome             | <b>77</b>                                                   | 4                                         |
|                  |                            | 4 REACTOME_APOPTOTIC_CLEAVAGE_OF_CELLULAR_PROTEINS          | 0                                         |
|                  |                            | REACTOME_CASPASE_MEDIATED_CLEAVAGE_OF_CYTOSKELETAL_PROTEINS | 0                                         |
|                  |                            | REACTOME_APOPTOSIS                                          | 0                                         |
|                  |                            | REACTOME_APOPTOTIC_EXECUTION_PHASE                          | 0                                         |
|                  | c5.all                     | 73 ORGANELLE_PART                                           | 0                                         |
|                  |                            | AXON                                                        | 0                                         |
|                  |                            | MICROTUBULE_ASSOCIATED_COMPLEX                              | 0                                         |
|                  |                            | MICROTUBULE_CYTOSKELETON                                    | 0                                         |
|                  |                            | CYTOPLASMIC_PART                                            | 0                                         |
|                  |                            | MEMBRANE                                                    | 0                                         |
|                  |                            | CYTOPLASM                                                   | 0                                         |
|                  |                            | NON_MEMBRANE_BOUND_ORGANELLE                                | 0                                         |
|                  |                            | CYTOSKELETAL_PART                                           | 0                                         |
|                  |                            | CYTOSOL                                                     | 0                                         |
|                  |                            | CYTOSKELETON                                                | 0                                         |
|                  |                            | MICROTUBULE                                                 | 0                                         |
|                  |                            | CELL_PROJECTION                                             | 0                                         |
|                  |                            | INTRACELLULAR_NON_MEMBRANE_BOUND_ORGANELLE                  | 0                                         |
|                  |                            | INTRACELLULAR_ORGANELLE_PART                                | 0                                         |
|                  |                            | MACROMOLECULAR_COMPLEX                                      | 0                                         |
|                  |                            | PROTEIN_COMPLEX                                             | 0                                         |
|                  |                            | SITE_OF_POLARIZED_GROWTH                                    | 0                                         |
|                  |                            | GROWTH_CONE                                                 | 0                                         |
|                  |                            | NEURON_PROJECTION                                           | 0                                         |
|                  | PLASMA_MEMBRANE            | 0                                                           |                                           |
|                  | SYSTEM_DEVELOPMENT         | 0                                                           |                                           |
|                  | NERVOUS_SYSTEM_DEVELOPMENT | 0                                                           |                                           |

|                                                                       |   |
|-----------------------------------------------------------------------|---|
| CELL_DEVELOPMENT                                                      | 0 |
| NEURITE_DEVELOPMENT                                                   | 1 |
| REGULATION_OF_ANATOMICAL_STRUCTURE_MORPHOGENESIS                      | 0 |
| MICROTUBULE_BASED_PROCESS                                             | 0 |
| REGULATION_OF_AXONOGENESIS                                            | 0 |
| ORGANELLE_ORGANIZATION_AND_BIOGENESIS                                 | 0 |
| REGULATION_OF_PROTEIN_POLYMERIZATION                                  | 0 |
| ANATOMICAL_STRUCTURE_MORPHOGENESIS                                    | 0 |
| AXONOGENESIS                                                          | 1 |
| MICROTUBULE_CYTOSKELETON_ORGANIZATION_AND_BIOGENESIS                  | 0 |
| REGULATION_OF_PROTEIN_METABOLIC_PROCESS                               | 0 |
| REGULATION_OF_DEVELOPMENTAL_PROCESS                                   | 0 |
| CELLULAR_MORPHOGENESIS_DURING_DIFFERENTIATION                         | 1 |
| GENERATION_OF_NEURONS                                                 | 0 |
| REGULATION_OF_CELLULAR_COMPONENT_ORGANIZATION_AND_BIOGENESIS          | 0 |
| MULTICELLULAR_ORGANISMAL_DEVELOPMENT                                  | 0 |
| POSITIVE_REGULATION_OF_CELLULAR_PROTEIN_METABOLIC_PROCESS             | 0 |
| PROTEIN_POLYMERIZATION                                                | 0 |
| REGULATION_OF_CELLULAR_METABOLIC_PROCESS                              | 0 |
| POSITIVE_REGULATION_OF_DEVELOPMENTAL_PROCESS                          | 0 |
| REGULATION_OF_ORGANELLE_ORGANIZATION_AND_BIOGENESIS                   | 0 |
| POSITIVE_REGULATION_OF_METABOLIC_PROCESS                              | 0 |
| CELLULAR_PROTEIN_METABOLIC_PROCESS                                    | 0 |
| POSITIVE_REGULATION_OF_CELLULAR_COMPONENT_ORGANIZATION_AND_BIOGENESIS | 0 |
| ESIS                                                                  | 0 |
| PROTEIN_METABOLIC_PROCESS                                             | 0 |
| POSITIVE_REGULATION_OF_CYTOSKELETON_ORGANIZATION_AND_BIOGENESIS       | 0 |
| ANATOMICAL_STRUCTURE_DEVELOPMENT                                      | 0 |
| POSITIVE_REGULATION_OF_CELLULAR_METABOLIC_PROCESS                     | 0 |
| POSITIVE_REGULATION_OF_BIOLOGICAL_PROCESS                             | 0 |
| REGULATION_OF_NEUROGENESIS                                            | 0 |

|                                                        |   |
|--------------------------------------------------------|---|
| NEUROGENESIS                                           | 0 |
| REGULATION_OF_CYTOSKELETON_ORGANIZATION_AND_BIOGENESIS | 0 |
| REGULATION_OF_METABOLIC_PROCESS                        | 0 |
| NEURON_DIFFERENTIATION                                 | 0 |
| NEURON_DEVELOPMENT                                     | 1 |
| POSITIVE_REGULATION_OF_PROTEIN_METABOLIC_PROCESS       | 0 |
| CYTOSKELETON_ORGANIZATION_AND_BIOGENESIS               | 0 |
| CELLULAR_MACROMOLECULE_METABOLIC_PROCESS               | 0 |
| POSITIVE_REGULATION_OF_CELLULAR_PROCESS                | 0 |
| REGULATION_OF_CELLULAR_PROTEIN_METABOLIC_PROCESS       | 0 |
| MICROTUBULE_POLYMERIZATION_OR_DEPOLYMERIZATION         | 0 |
| PROTEIN_DOMAIN_SPECIFIC_BINDING                        | 0 |
| SH3_DOMAIN_BINDING                                     | 0 |
| MICROTUBULE_BINDING                                    | 0 |
| LIPOPROTEIN_BINDING                                    | 0 |
| TUBULIN_BINDING                                        | 0 |
| STRUCTURAL_MOLECULE_ACTIVITY                           | 0 |
| CYTOSKELETAL_PROTEIN_BINDING                           | 0 |
| STRUCTURAL_CONSTITUENT_OF_CYTOSKELETON                 | 0 |
| ENZYME_BINDING                                         | 0 |
